# Supplementary material for: Social Incentives and Gamification to Promote Weight Loss: The LOSE IT Randomized, Controlled Trial
Source: Springer Nature journal article supplement (doi:10.1007/s11606-018-4552-1), 2018-07-12
Supplement: MOESM1 [file 15948982]

**Online Appendix 1**

**Study Protocol**

Table of Contents

1. Summary of changes to the protocol

2. Original Study Protocol

3. Final Study Protocol

**Summary of Changes to the Protocol**

There were not major changes to the design of the study. In October 2015, we modified the text of the recruitment email. In February 2016, we increased the target sample size to accommodate the high demand for the study. In March 2016, we changed the weight loss trigger to alert us when a participant gains 10 lbs in a week rather than 5 lbs. because the alert had gone off 109 times without any unsafe events so we raised the level to reduce unnecessary phone calls to participants.

**Original Study Protocol**

**A Randomized, Controlled Trial Using Social Incentives and Gamification to Promote Weight Loss**

Study Protocol

August 24, 2015

**Outline**

1. Abstract

2. Overall objectives

3. Aims

3.1 Primary outcome

3.2 Secondary outcomes

4. Background

5. Study design

5.1 Design

5.2 Study duration

5.3 Target population

5.4 Accrual

5.5 Key inclusion criteria

5.6 Key exclusion criteria

6. Subject recruitment

7. Subject compensation

8. Study procedures

8.1 Consent

8.2 Procedures

9. Analysis plan

10. Investigators

11. Human research protection

11.1 Data confidentiality

11.2 Subject confidentiality

11.3 Subject privacy

11.4 Data disclosure

11.5 Data safety and monitoring

11.6 Risk/benefit

11.6.1 Potential study risks

11.6.2 Potential study benefits

11.6.3 Risk/benefit assessment

**1. Abstract**

Obesity is a leading risk factor for morbidity and mortality affecting more than one in three adults in the United States. Modifiable health behaviors contribute to this growing epidemic. Insights from behavioral economics have shown promise for motivating behavior change through the use of financial incentives. However, social incentives or those influences that impact individuals to adjust their inherent behaviors based on social ties and connections have not been well examined. Social incentives are a more patient-centered approach that leverages and enhances the existing connections and influences on the individual. Since one individual’s behavior change is connected to many others within their network, social incentives have the potential to be a scalable intervention that impacts the community. Gamification, or the use of game design in non-game situations, is often used in the real world, but its effectiveness is unknown. In this study, we will conduct a 36-week, three-arm, randomized, controlled trial using a team-based model to compare two weight loss programs to control. Each intervention will use insights from behavioral economics to leverage social incentives and gamification.

**2. Overall objectives**

The objective of this study is to use a randomized, controlled trial to test the effectiveness of two weight loss interventions using social incentives and gamification.

**3. Aims**

*3.1 Primary outcome*

The primary outcome variable is change in weight in pounds during the 24-week intervention period.

*3.2 Secondary outcome*

Secondary outcomes include the change in weight in pounds during the 12-week follow-up period, and mean daily steps during the intervention period and follow-up period.

**4. Background**

Obesity is associated with major health complications including coronary heart disease, type 2 diabetes, hypertension, osteoarthritis, and cancer (1-3). In the United States, 33% of adults are obese and another 40% are overweight, levels that have not improved in over a decade (4). While many behavioral interventions have been shown to be effective for weight loss in controlled settings (5-6), it has been challenging to deploy them at larger scale. These interventions tend to be personnel intensive and often are not patient-centered.

Obesity is significantly impacted by social influences specific to the patient. An individual’s chance of becoming obese increases if a spouse, sibling or friend becomes obese (7). However, there is also evidence that changing behavior for improved health is influenced by social connections (8). Therefore, there is significant potential for improving health by better understanding how to best use patient-centered social incentives to motivate behavior change. Insights from behavioral economics reveal that the design and the delivery of incentives have an important influence on their effectiveness because people tend to be predictably irrational and respond more to incentives that recognize systematic tendencies to overweight the immediate costs and benefits of their actions, as well as other factors such as the salience of rewards, the overweighting of small probabilities, and anticipated regret (9).

[1] Bray GA. Risks of obesity. *Endocrinol Metab Clin North Am*. 2003;32:787-804. [2] Jensen MD, Ryan DH, Apovian CM, et al. 2013 AHA/ACC/TOS Guideline for the Management of Overweight and Obesity in Adults: A Report of the American College of Cardiology/American Heart Association Task Force on Practice Guidelines and The Obesity Society. *Circulation*. 2013. [3] Widlansky ME, Sesso HD, Rexrode KM, et al. Body mass index and total cardiovascular mortality in men with a history of cardiovascular disease. *Arch Intern Med*. 2004;164:2326-32. [4] Ogden CL, Carroll MD, Kit BK, Flegal KM. Prevalence of childhood and adult obesity in the United States, 2011-2012. *JAMA*. 2014;311(8):806-14. [5] Wadden TA, Butryn ML, Byrne KJ. Efficacy of lifestyle modification for long-term weight control. *Obes Res*. 2004;12 Suppl:151S-62S. [6] Wing RR. Behavioral treatment of obesity. In: Wadden TA, Stunkard AJ, eds. Handbook of obesity treatment. New York: Guilford, 2002:301-316. [7] Christakis NA, Fowler JH. The spread of obesity in a large social network over 32 years. *N Engl J Med*. 2007;357(4):370-9. [8] Jackson SE, Steptoe A, Wardle J. The Influence of Partner's Behavior on Health Behavior Change: The English Longitudinal Study of Ageing. *JAMA Intern Med*. 2015;175(3):385-92. [9] Loewenstein G, Brennan T, Volpp KG. Asymmetric paternalism to improve health behaviors. *JAMA*. 2007;298(20):2415-2417.

**5. Study design**

*5.1 Design*

This is a three-arm, 36-week randomized, controlled trial with a 24-week intervention period and a 12-week follow-up period. The study will be conducted using Way to Health, an automated information technology platform at the University of Pennsylvania that integrates wireless devices, conducts clinical trial randomization and enrollment processes, delivers messaging (text or email) and self-administered surveys, automates payment transfers, and securely captures data for research purposes.

This study will enroll participants in teams of two individuals because this design may enhance social incentives such as peer support, accountability to teammates, and unity towards a common goal. Participants will be encouraged to find a teammate that also meets eligibility criteria and with whom they have frequent contact (e.g. at least 3 times per week) such as a spouse/partner, relative, co-worker, or close friend.

All participants will be asked to conduct the following: 1) Use a Withings weight scale for home-based weight monitoring; 2) Use the Withings smartphone application to track daily step counts using accelerometers within the smartphone; 3) Choose a weight loss goal for the 24-week intervention period that is between 6% to 8% of their baseline weight. As conducted in prior weight loss studies, the slope of the weight loss trajectory will be reset every 4 weeks to give those falling behind a chance to catch up and those farther ahead the ability to slow down

All participants will receive $20 to enroll in the study, $20 to conduct a weigh-in at 12 weeks, $40 to complete a weigh-in at 24 weeks, and $40 to complete a weigh-in at 36 weeks. Weigh-ins can be done in-person or remotely using facetime.

Participants will be evenly assigned as teams (two individuals per team) to control (a weight loss monitoring program) or one of two social incentive weight loss programs using block sizes of 3 teams. The study arms are as follows:

Arm 1) Individual Control: Participants are told to use the home weight scales as often as they like. Participants are asked to carry their smartphones with them when they are active to track their daily step counts. They will be given information on the federal and CDC guidelines for physical activity and will also be told that they should strive to achieve 10,000 steps per day to help promote weight loss.

At 12 weeks, participants will receive a call from the study coordinator to inquire how the study is going and if there are any issues that need to be addressed. During this phone call they will confirm the time for the 24-week in-person weigh-in.

Arm 2) Gamification Intervention:

All participants will be entered with their teammate into a game and will conduct the following: The participants begin by electronically signing a pre-commitment pledge to meet their weight loss target by the end of the 24 weeks. All teams begin the game in the silver level and have the opportunity to advance up to the gold and platinum levels or go down to the bronze level. At the start of each week, each team will receive 70 points. Each day, one of the two participants is randomly selected to represent their team. If the participant selected did not weigh in on the prior day, that team loses 10 points (loss aversion). At the end of the week, if the team has at least 40 points (met goal on 4 of 7 days) and both participants met their weight loss target for that week on at least one day that week, then the team advances to the next level up (e.g. bronze to silver). If the team has less than 40 points or both participants did not meet their weight loss goal, then they fall to a lower level (e.g. gold to silver). At the start of each new week, the team begins with a fresh set of 70 points. During week 1, they will be asked to at least maintain their baseline weight. Then, they will be asked to lose their goal weight over the remaining 23 weeks.

At 12 weeks, participants will receive a call from the study coordinator to inquire how the study is going and if there are any issues that need to be addressed. During this phone call they will confirm the time for the 24 week weigh-in.

After the 24-week weigh-in, participants will be asked to continue the intervention for an additional 12-week follow-up period. If they have achieved their weight loss goal, they will continue the gamification intervention and their goal will be set to main their current weight. If the participant did not reach their 24-week goal, they will be allowed to select a goal of achieving the remaining total remaining weight loss by 36 weeks or half of the remaining total weight loss by 36 weeks.

All teams will receive weekly communications on both participants including the weight loss progress so far, the mean step count during the past week, and the weight target for the upcoming week. If the participants have 5 days or more in a row without weight data, the research coordinator may reach out by phone to inquire if there are any issues with the device or study participation. Participants will have the opportunity to win a trophy or a plaque depending on their level of weight loss achievement.

Arm 3) Gamification Intervention plus sharing data with the PCP:

Participants will be asked to allow the study team to share their weight and step data with their primary care physician (PCP) either through MyPennMedicine’s HealthKit integration (if PCP is at UPenn) or by monthly mail to PCPs not at UPenn.

All participants will be entered with their teammate into a game and will conduct the following: The participants begin by electronically signing a pre-commitment pledge to meet their weight loss target by the end of the 24 weeks. All teams begin the game in the silver level and have the opportunity to advance up to the gold and platinum levels or go down to the bronze level. At the start of each week, each team will receive 70 points. Each day, one of the two participants is randomly selected to represent their team. If the participant selected did not weigh in on the prior day, that team loses 10 points (loss aversion). At the end of the week, if the team has at least 40 points (met goal on 4 of 7 days) and both participants met their weight loss target for that week on at least one day that week, then the team advances to the next level up (e.g. bronze to silver). If the team has less than 40 points or both participants did not meet their weight loss goal, then they fall to a lower level (e.g. gold to silver). At the start of each new week, the team begins with a fresh set of 70 points. During week 1, they will be asked to at least maintain their baseline weight, then they will be asked to lose their goal weight over the remaining 23 weeks.

At 12 weeks, participants will receive a call from the study coordinator to inquire how the study is going and if there are any issues that need to be addressed. During this phone call they will confirm the time for the 24-week weigh-in.

After the 24-week weigh-in, participants will be asked to continue the intervention for an additional 12-week follow-up period. If they have achieved their weight loss goal, they will continue the gamification intervention and their goal will be set to main their current weight. If the participant did not reach their 24-week goal, they will be allowed to select a goal of achieving the remaining total remaining weight loss by 36 weeks or half of the remaining total weight loss by 36 weeks.

All teams will receive weekly communications on both participants including the weight loss progress so far, the mean step count during the past week, and the weight target for the upcoming week. If the participants have 5 days or more in a row without weight data, the research coordinator may reach out by phone to inquire if there are any issues with the device or study participation. Participants will have the opportunity to win a trophy, plaque, or medal depending on their level of weight loss achievement.

*5.2 Study duration*

This study includes a 24-week intervention period and a 12-week follow-up period.

*5.3 Target population*

Adults age 18 years or older with a body mass index of 30 or greater.

*5.4 Accrual*

Participants will be recruited from the patient population at the UPenn primary care clinics and potentially from the University of Pennsylvania and University of Pennsylvania Health System employee populations. We estimate that a sample size of 150 participants (75 teams of two persons) will provide at least 80% power to detect an 8-pound difference between any of the intervention arms and the control arm, assuming a standard deviation of 10 lbs., a 20% dropout rate, and using a conservative Bonferroni adjustment of the Type I error rate with a two-sided α level of 0.025.

*5.5 Key inclusion criteria*

1) Age 18 years to 70 years; 2) ability to read and provide informed consent to participate in the study; 3) has an iPhone 4 or newer device that they are willing to use for the 36-week study to track weight and step count data; 4) Patients will be required to have at least a self-reported body mass index (BMI) of 30 or greater. However, since the self-report may not be accurate and because weight can fluctuate, when they arrive for the in-person baseline weigh-in they will be allowed to participate if their BMI is 28 or greater.

*5.6 Key exclusion criteria*

1) Conditions that would make participation infeasible such as inability to provide informed consent, illiteracy or inability to speak, read, and write English; 2) conditions that would make participation unsafe such as current treatment for drug or alcohol use, myocardial infarction or stroke within the last 6 months, metastatic cancer, pregnant, breastfeeding or plan to become pregnant during study period, previous diagnosis of an eating disorder, or history of unsafe weight loss practices; 3) already enrolled in another weight loss study; 4) any other medical conditions or reasons that they could not complete a 36-week weight loss program

**6. Subject recruitment**

To recruit potentially eligible participants, we will place flyers and posters at the Penn primary care clinics with a phone number to contact the research study coordinator and a website to learn more about the study. We will also work with the Human resources departments at the University of Pennsylvania and the University of Pennsylvania Health System to recruit participants from the employee population.

**7. Subject compensation**

All participants will receive $20 to enroll in the study, $20 to complete a weigh-in at 12 weeks, $40 to complete a weigh-in at 24 weeks, and $40 to complete a weigh-in at 36 weeks.

**8. Study procedures**

*8.1 Consent*

Upon recruitment, individuals who are interested in learning more about the study will be directed to the Way to Health web portal. Upon reaching the portal, potential participants will be asked to create an account and will then be informed of the details of the study, including its objectives, duration, requirements, and financial payments. If participants are still interested in participating, the Way to Health portal will take them through an automated online informed consent. The consent document will be divided into sections and potential participants will have to click a button to advance through each section. This is to help ensure that participants read the consent form thoroughly by breaking down the form into manageable blocks of text. Each section will have a button allowing the user to contact a researcher via email or by telephone if they have questions about the consent form. Successive screens will explain the voluntary nature of the study, the risks and benefits of participation, alternatives to participation, and that participants can withdraw from the study at any time. On the final consent screen, potential participants who click a clearly delineated button stating that they agree to participate in the study will be considered to have consented to enroll. Participants will be provided with details regarding how to contact the research team via email or phone at any time if they subsequently wish to withdraw from the study. This contact information will remain easily accessible via the participants’ individual Way to Health web portal dashboards throughout the study.

*8.2 Procedures*

After providing informed consent, participants will complete an online questionnaire to determine their eligibility and complete the study surveys. Eligible participants will receive a phone call from the research study coordinator to schedule a time for an in-person baseline weigh-in with their teammate. During that meeting, the participant will be given a wireless weight scale and be shown how to use the Withings app to sync weight data and track physical activity. The participant will be asked to select a weight loss goal in pounds that is between 6% to 8% of their baseline weight. The will be offered pre-selected goals at the 6, 7, and 8% target rounded up to the nearest pound, but will be able to choose any weight goal within the 6 to 8% range.

Participants randomized to the intervention arms will be given the instructions of the intervention.

**9. Analysis plan**

To compare sample characteristics between arms we will use t-tests or Wilcoxon rank-sum tests (F-tests or Kruskal-Wallis test) for continuous variables and Pearson chi square tests or Fisher’s exact tests for categorical variables. In our primary analyses, we will compare change in weight for each intervention arm to the control arm at the end of the 24-week intervention period. In the secondary analysis will compare change in weight at the end of the 12-week follow-up period. We will also compare the mean daily steps and the proportion of days achieving the 10,000 step goal for each intervention arm vs. control. All hypothesis tests will be two-sided using a two-sided alpha of 0.025 as our threshold for statistical significance. We will use Stata and/or SAS to analyze the data. We will use multiple imputation for missing data.

**10. Investigators**

Mitesh Patel, MD, MBA, MS is the Principal Investigator (PI) and is an Assistant Professor of Medicine and Health Care Management at the Perelman School of Medicine and The Wharton School at the University of Pennsylvania. He has past experience leading six clinical trials using the Way to Health Platform to deploy interventions using financial and social incentives to promote weight loss and increased physical activity. He currently spends 80% of his effort on research and 20% on clinical and teaching activities.

**11. Human research protection**

*11.1 Data confidentiality*

Paper-based records will be kept in a secure location and only be accessible to personnel involved in the study. Computer-based files will only be made available to personnel involved in the study through the use of access privileges and passwords. Wherever feasible, identifiers will be removed from study-related information. Precautions are in place to ensure the data are secure by using passwords and encryption, because the research involves web-based surveys.

*11.2 Subject confidentiality*

Research material will be obtained from participant surveys, from the weight scales, and from the accelerometers in the smartphone. All participants will provide informed consent for access to these materials. The data to be collected include demographic data (e.g., age, sex, self-identified race), weight data, and daily activity data collected by the smartphone. Research material that is obtained will be used for research purposes only. The same procedure used for the analysis of automated data sources to ensure protection of patient information will be used for the survey data, in that patient identifiers will be used only for linkage purposes or to contact patients. The study identification number, and not other identifying information, will be used on all data collection instruments. All study staff will be reminded to appreciate the confidential nature of the data collected and contained in these databases. The Penn Medicine Academic Computing Services (PMACS) will be the hub for the hardware and database infrastructure that will support the project and is where the Way to Health web portal is based. The PMACS is a joint effort of the University of Pennsylvania's Abramson Cancer Center, the Cardiovascular Institute, the Department of Pathology, and the Leonard Davis Institute. The PMACS provides a secure computing environment for a large volume of highly sensitive data, including clinical, genetic, socioeconomic, and financial information. Among the IT projects currently managed by PMACS are: (1) the capture and organization of complex, longitudinal clinical data via web and clinical applications portals from cancer patients enrolled in clinical trials; (2) the integration of genetic array databases and clinical data obtained from patients with cardiovascular disease; (3) computational biology and cytometry database management and analyses; (4) economic and health policy research using Medicare claims from over 40 million Medicare beneficiaries. PMACS requires all users of data or applications on PMACS servers to complete a PMACS-hosted cybersecurity awareness course annually, which stresses federal data security policies under data use agreements with the university. The curriculum includes Health Insurance Portability and Accountability Act (HIPAA) training and covers secure data transfer, passwords, computer security habits and knowledge of what constitutes misuse or inappropriate use of the server. We will implement multiple, redundant protective measures to guarantee the privacy and security of the participant data. All investigators and research staff with direct access to the identifiable data will be required to undergo annual responsible conduct of research, cybersecurity, and HIPAA certification in accordance with University of Pennsylvania regulations. All data for this project will be stored on the secure/firewalled servers of the PMACS Data Center, in data files that will be protected by multiple password layers. These data servers are maintained in a guarded facility behind several locked doors, with very limited physical access rights. They are also cyber-protected by extensive firewalls and multiple layers of communication encryption. Electronic access rights are carefully controlled by University of Pennsylvania system managers. We will use highly secure methods of data encryption for all transactions involving participants’ financial information using a level of security comparable to what is used in commercial financial transactions. We believe this multi-layer system of data security, identical to the system protecting the University of Pennsylvania Health Systems medical records, greatly minimizes the risk of loss of privacy. In addition, risk of loss of confidentiality will be minimized by storing completed paper copies of the surveys and signed informed consent forms in locked file cabinets in locked offices accessible only to trained study staff. Each subject will be assigned a unique identifier without identifying information, and data will be entered into an electronic database using only the unique identifier. Only trained study staff will have access to the code that links the unique identifier to the subject’s identity. Electronic data will be stored on secure, password-protected firewalled servers at the University of Pennsylvania.

*11.3 Subject privacy*

Interested participants will be directed to the Way to Health portal where they will be asked to enter data related to eligibility and their demographic characteristics. Enrollment will include a description of the voluntary nature of participation, the study procedures, risks and potential benefits in detail. The enrollment procedure will provide the opportunity for potential participants to ask questions and review the consent form information with family and friends prior to making a decision to participate. Participants will be told that they do not have to answer any questions if they do not wish and can drop out of the study at any time, without affecting their medical care or the cost of their care. They will be told that they may or may not benefit directly from the study and that all information will be kept strictly confidential, except as required by law. Subjects will be given a copy of the consent document. All efforts will be made by study staff to ensure subject privacy.

*11.4 Data disclosure*

The following entities, besides the members of the research team, may receive protected health information (PHI) for this research study: -Wells Fargo, the company which processes study-related payments. Patient addresses and account balances will be stored on their secure computers. –P’unk Ave., LLC, a software development company designing the Way to Health website. P’unk Ave. will not store any of the patients' PHI, but they will have access to de-identified patient information, for the purposes of website administration and development. - Misfit Wearables, the company that designs and manufactures the wearable devices used in the study to track participant physical activity. -Twilio, Inc., the company which processes some study-related messages. Twilio will store patients' phone numbers on their secure computers. -Qualtrics, Inc., the company which processes most study-related surveys. Qualtrics will house de-identified answers to these surveys on their secure servers. -The Office of Human Research Protections at the University of Pennsylvania -Federal and state agencies (for example, the Department of Health and Human Services, the National Institutes of Health, and/or the Office for Human Research Protections), or other domestic or foreign government bodies if required by law and/or necessary for oversight purposes.

*11.5 Data safety and monitoring*

The data monitoring system will track participant weight loss for the duration of the study. The electronic system will be programmed to alert the Study Coordinator by email whenever a participant loses more than 5 pounds per week, 8 pounds in two weeks, 12 pounds in four weeks. Participants who are flagged for excessive weight loss will be contacted by phone by the research study coordinator. During this phone call the research study coordinator will discuss the importance of moderate weight loss rates (i.e., 1-2 pounds per week) with the participant, remind the participant that there is no additional monetary benefit to losing weight rapidly, and encourage the individual to moderate their weight loss habits. In addition, the coordinator will ask the participant if he or she is engaging in any behaviors such as self-induced vomiting or dehydration, fasting, or excessive exercise. All cases of excessive weight loss will be discussed with the PI, who will consider whether continuation in the study is appropriate based on patterns of excessive weight loss and information provided by the participant. For this study there will be no stopping rules or endpoints and thus no planned interim analyses.

*11.6 Risk/benefit*

*11.6.1 Potential study risks*

To minimize the chance for serious and unexpected adverse events, study participants will be screened through exclusion criteria for any health conditions that may be exacerbated by participating in a weight loss study. The intervention tries to motivate a gradual weight loss that should pose little health risk to participants. Another potential risk of this study is a breach of participant confidentiality. We will minimize this risk by linking individual identifying information with participant ID numbers only in one single secure file that will only be accessed by the study team in the case of an adverse medical event, participant dropout, or if otherwise deemed necessary by the Principal Investigator. All other identifying information will be discarded after initial contact with the Study Coordinator. Due to the financial incentives in this study, we will be collecting social security numbers so that we can complete W-9 forms for participants. Social security numbers only will be used to generate W-9 forms and will be deleted once they are no longer needed. We will also collect home addresses to mail incentive payments. This will be done through a University of Pennsylvania approved partnership with Wells Fargo. Accidental disclosure of social security numbers could lead to identity theft. We will use commercial-grade encryption to protect social security information in transit. Names and addresses will be stored in encrypted databases. These data will be viewable only by the respective participants and the study coordinator. All other members of the research team will be able to view only participant ID numbers. There will be no functionality in the web application to export a dataset with identifiable information. Even the study arms will be identified by code letters until both the statistician and PI agree that analysis is complete.

*11.6.2 Potential study benefits*

Through participation in this study, each participant will have the potential to lose weight, which could improve their health and reduce their risk for future cardiovascular disease or other conditions such as diabetes, hypertension, and osteoarthritis. If this approach is effective, it could have tremendous benefits for society if adopted on a wide scale to help individuals lose weight. It is expected that other people will gain knowledge from this study and that participation could help understand how to effectively motivate people to lose weight. Participants may also receive no benefit from their participation in the study.

*11.6.3 Risk/benefit assessment*

Anticipated risks of this study should be minimal and the risk/benefit ratio is very favorable. To minimize the chance for serious and unexpected adverse events, study participants will be screened through exclusion criteria for any health conditions that may be exacerbated by participating in a weight loss study. Participants that lost weight may improve their health and reduce their risk for future cardiovascular disease or other conditions such as diabetes, hypertension, and osteoarthritis.

**Final Study Protocol**

**A Randomized, Controlled Trial Using Social Incentives and Gamification to Promote Weight Loss**

Study Protocol

August 24, 2015

**Outline**

1. Abstract

2. Overall objectives

3. Aims

3.1 Primary outcome

3.2 Secondary outcomes

4. Background

5. Study design

5.1 Design

5.2 Study duration

5.3 Target population

5.4 Accrual

5.5 Key inclusion criteria

5.6 Key exclusion criteria

6. Subject recruitment

7. Subject compensation

8. Study procedures

8.1 Consent

8.2 Procedures

9. Analysis plan

10. Investigators

11. Human research protection

11.1 Data confidentiality

11.2 Subject confidentiality

11.3 Subject privacy

11.4 Data disclosure

11.5 Data safety and monitoring

11.6 Risk/benefit

11.6.1 Potential study risks

11.6.2 Potential study benefits

11.6.3 Risk/benefit assessment

**1. Abstract**

Obesity is a leading risk factor for morbidity and mortality affecting more than one in three adults in the United States. Modifiable health behaviors contribute to this growing epidemic. Insights from behavioral economics have shown promise for motivating behavior change through the use of financial incentives. However, social incentives or those influences that impact individuals to adjust their inherent behaviors based on social ties and connections have not been well examined. Social incentives are a more patient-centered approach that leverages and enhances the existing connections and influences on the individual. Since one individual’s behavior change is connected to many others within their network, social incentives have the potential to be a scalable intervention that impacts the community. Gamification, or the use of game design in non-game situations, is often used in the real world, but its effectiveness is unknown. In this study, we will conduct a 36-week, three-arm, randomized, controlled trial using a team-based model to compare two weight loss programs to control. Each intervention will use insights from behavioral economics to leverage social incentives and gamification.

**2. Overall objectives**

The objective of this study is to use a randomized, controlled trial to test the effectiveness of two weight loss interventions using social incentives and gamification.

**3. Aims**

*3.1 Primary outcome*

The primary outcome variable is change in weight in pounds during the 24-week intervention period.

*3.2 Secondary outcome*

Secondary outcomes include the change in weight in pounds during the 12-week follow-up period, and mean daily steps during the intervention period and follow-up period.

**4. Background**

Obesity is associated with major health complications including coronary heart disease, type 2 diabetes, hypertension, osteoarthritis, and cancer (1-3). In the United States, 33% of adults are obese and another 40% are overweight, levels that have not improved in over a decade (4). While many behavioral interventions have been shown to be effective for weight loss in controlled settings (5-6), it has been challenging to deploy them at larger scale. These interventions tend to be personnel intensive and often are not patient-centered.

Obesity is significantly impacted by social influences specific to the patient. An individual’s chance of becoming obese increases if a spouse, sibling or friend becomes obese (7). However, there is also evidence that changing behavior for improved health is influenced by social connections (8). Therefore, there is significant potential for improving health by better understanding how to best use patient-centered social incentives to motivate behavior change. Insights from behavioral economics reveal that the design and the delivery of incentives have an important influence on their effectiveness because people tend to be predictably irrational and respond more to incentives that recognize systematic tendencies to overweight the immediate costs and benefits of their actions, as well as other factors such as the salience of rewards, the overweighting of small probabilities, and anticipated regret (9).

[1] Bray GA. Risks of obesity. *Endocrinol Metab Clin North Am*. 2003;32:787-804. [2] Jensen MD, Ryan DH, Apovian CM, et al. 2013 AHA/ACC/TOS Guideline for the Management of Overweight and Obesity in Adults: A Report of the American College of Cardiology/American Heart Association Task Force on Practice Guidelines and The Obesity Society. *Circulation*. 2013. [3] Widlansky ME, Sesso HD, Rexrode KM, et al. Body mass index and total cardiovascular mortality in men with a history of cardiovascular disease. *Arch Intern Med*. 2004;164:2326-32. [4] Ogden CL, Carroll MD, Kit BK, Flegal KM. Prevalence of childhood and adult obesity in the United States, 2011-2012. *JAMA*. 2014;311(8):806-14. [5] Wadden TA, Butryn ML, Byrne KJ. Efficacy of lifestyle modification for long-term weight control. *Obes Res*. 2004;12 Suppl:151S-62S. [6] Wing RR. Behavioral treatment of obesity. In: Wadden TA, Stunkard AJ, eds. Handbook of obesity treatment. New York: Guilford, 2002:301-316. [7] Christakis NA, Fowler JH. The spread of obesity in a large social network over 32 years. *N Engl J Med*. 2007;357(4):370-9. [8] Jackson SE, Steptoe A, Wardle J. The Influence of Partner's Behavior on Health Behavior Change: The English Longitudinal Study of Ageing. *JAMA Intern Med*. 2015;175(3):385-92. [9] Loewenstein G, Brennan T, Volpp KG. Asymmetric paternalism to improve health behaviors. *JAMA*. 2007;298(20):2415-2417.

**5. Study design**

*5.1 Design*

This is a three-arm, 36-week randomized, controlled trial with a 24-week intervention period and a 12-week follow-up period. The study will be conducted using Way to Health, an automated information technology platform at the University of Pennsylvania that integrates wireless devices, conducts clinical trial randomization and enrollment processes, delivers messaging (text or email) and self-administered surveys, automates payment transfers, and securely captures data for research purposes.

This study will enroll participants in teams of two individuals because this design may enhance social incentives such as peer support, accountability to teammates, and unity towards a common goal. Participants will be encouraged to find a teammate that also meets eligibility criteria and with whom they have frequent contact (e.g. at least 3 times per week) such as a spouse/partner, relative, co-worker, or close friend.

All participants will be asked to conduct the following: 1) Use a Withings weight scale for home-based weight monitoring; 2) Use the Withings smartphone application to track daily step counts using accelerometers within the smartphone; 3) Choose a weight loss goal for the 24-week intervention period that is between 6% to 8% of their baseline weight. As conducted in prior weight loss studies, the slope of the weight loss trajectory will be reset every 4 weeks to give those falling behind a chance to catch up and those farther ahead the ability to slow down

All participants will receive $20 to enroll in the study, $20 to conduct a weigh-in at 12 weeks, $40 to complete a weigh-in at 24 weeks, and $40 to complete a weigh-in at 36 weeks. Weigh-ins can be done in-person or remotely using facetime.

Participants will be evenly assigned as teams (two individuals per team) to control (a weight loss monitoring program) or one of two social incentive weight loss programs using block sizes of 3 teams. The study arms are as follows:

Arm 1) Individual Control: Participants are told to use the home weight scales as often as they like. Participants are asked to carry their smartphones with them when they are active to track their daily step counts. They will be given information on the federal and CDC guidelines for physical activity and will also be told that they should strive to achieve 10,000 steps per day to help promote weight loss.

At 12 weeks, participants will receive a call from the study coordinator to inquire how the study is going and if there are any issues that need to be addressed. During this phone call they will confirm the time for the 24-week in-person weigh-in.

Arm 2) Gamification Intervention:

All participants will be entered with their teammate into a game and will conduct the following: The participants begin by electronically signing a pre-commitment pledge to meet their weight loss target by the end of the 24 weeks. All teams begin the game in the silver level and have the opportunity to advance up to the gold and platinum levels or go down to the bronze level. At the start of each week, each team will receive 70 points. Each day, one of the two participants is randomly selected to represent their team. If the participant selected did not weigh in on the prior day, that team loses 10 points (loss aversion). At the end of the week, if the team has at least 40 points (met goal on 4 of 7 days) and both participants met their weight loss target for that week on at least one day that week, then the team advances to the next level up (e.g. bronze to silver). If the team has less than 40 points or both participants did not meet their weight loss goal, then they fall to a lower level (e.g. gold to silver). At the start of each new week, the team begins with a fresh set of 70 points. During week 1, they will be asked to at least maintain their baseline weight. Then, they will be asked to lose their goal weight over the remaining 23 weeks.

At 12 weeks, participants will receive a call from the study coordinator to inquire how the study is going and if there are any issues that need to be addressed. During this phone call they will confirm the time for the 24 week weigh-in.

After the 24-week weigh-in, participants will be asked to continue the intervention for an additional 12-week follow-up period. If they have achieved their weight loss goal, they will continue the gamification intervention and their goal will be set to main their current weight. If the participant did not reach their 24-week goal, they will be allowed to select a goal of achieving the remaining total remaining weight loss by 36 weeks or half of the remaining total weight loss by 36 weeks.

All teams will receive weekly communications on both participants including the weight loss progress so far, the mean step count during the past week, and the weight target for the upcoming week. If the participants have 5 days or more in a row without weight data, the research coordinator may reach out by phone to inquire if there are any issues with the device or study participation. Participants will have the opportunity to win a trophy or a plaque depending on their level of weight loss achievement.

Arm 3) Gamification Intervention plus sharing data with the PCP:

Participants will be asked to allow the study team to share their weight and step data with their primary care physician (PCP) either through MyPennMedicine’s HealthKit integration (if PCP is at UPenn) or by monthly mail to PCPs not at UPenn.

All participants will be entered with their teammate into a game and will conduct the following: The participants begin by electronically signing a pre-commitment pledge to meet their weight loss target by the end of the 24 weeks. All teams begin the game in the silver level and have the opportunity to advance up to the gold and platinum levels or go down to the bronze level. At the start of each week, each team will receive 70 points. Each day, one of the two participants is randomly selected to represent their team. If the participant selected did not weigh in on the prior day, that team loses 10 points (loss aversion). At the end of the week, if the team has at least 40 points (met goal on 4 of 7 days) and both participants met their weight loss target for that week on at least one day that week, then the team advances to the next level up (e.g. bronze to silver). If the team has less than 40 points or both participants did not meet their weight loss goal, then they fall to a lower level (e.g. gold to silver). At the start of each new week, the team begins with a fresh set of 70 points. During week 1, they will be asked to at least maintain their baseline weight, then they will be asked to lose their goal weight over the remaining 23 weeks.

At 12 weeks, participants will receive a call from the study coordinator to inquire how the study is going and if there are any issues that need to be addressed. During this phone call they will confirm the time for the 24-week weigh-in.

After the 24-week weigh-in, participants will be asked to continue the intervention for an additional 12-week follow-up period. If they have achieved their weight loss goal, they will continue the gamification intervention and their goal will be set to main their current weight. If the participant did not reach their 24-week goal, they will be allowed to select a goal of achieving the remaining total remaining weight loss by 36 weeks or half of the remaining total weight loss by 36 weeks.

All teams will receive weekly communications on both participants including the weight loss progress so far, the mean step count during the past week, and the weight target for the upcoming week. If the participants have 5 days or more in a row without weight data, the research coordinator may reach out by phone to inquire if there are any issues with the device or study participation. Participants will have the opportunity to win a trophy, plaque, or medal depending on their level of weight loss achievement.

*5.2 Study duration*

This study includes a 24-week intervention period and a 12-week follow-up period.

*5.3 Target population*

Adults age 18 years or older with a body mass index of 30 or greater.

*5.4 Accrual*

Participants will be recruited from the patient population at the UPenn primary care clinics and potentially from the University of Pennsylvania and University of Pennsylvania Health System employee populations. We estimate that a sample size of 150 participants (75 teams of two persons) will provide at least 80% power to detect an 8-pound difference between any of the intervention arms and the control arm, assuming a standard deviation of 10 lbs., a 20% dropout rate, and using a conservative Bonferroni adjustment of the Type I error rate with a two-sided α level of 0.025.

*5.5 Key inclusion criteria*

1) Age 18 years to 70 years; 2) ability to read and provide informed consent to participate in the study; 3) has an iPhone 4 or newer device that they are willing to use for the 36-week study to track weight and step count data; 4) Patients will be required to have at least a self-reported body mass index (BMI) of 30 or greater. However, since the self-report may not be accurate and because weight can fluctuate, when they arrive for the in-person baseline weigh-in they will be allowed to participate if their BMI is 28 or greater.

*5.6 Key exclusion criteria*

1) Conditions that would make participation infeasible such as inability to provide informed consent, illiteracy or inability to speak, read, and write English; 2) conditions that would make participation unsafe such as current treatment for drug or alcohol use, myocardial infarction or stroke within the last 6 months, metastatic cancer, pregnant, breastfeeding or plan to become pregnant during study period, previous diagnosis of an eating disorder, or history of unsafe weight loss practices; 3) already enrolled in another weight loss study; 4) any other medical conditions or reasons that they could not complete a 36-week weight loss program

**6. Subject recruitment**

To recruit potentially eligible participants, we will place flyers and posters at the Penn primary care clinics with a phone number to contact the research study coordinator and a website to learn more about the study. We will also work with the Human resources departments at the University of Pennsylvania and the University of Pennsylvania Health System to recruit participants from the employee population.

**7. Subject compensation**

All participants will receive $20 to enroll in the study, $20 to complete a weigh-in at 12 weeks, $40 to complete a weigh-in at 24 weeks, and $40 to complete a weigh-in at 36 weeks.

**8. Study procedures**

*8.1 Consent*

Upon recruitment, individuals who are interested in learning more about the study will be directed to the Way to Health web portal. Upon reaching the portal, potential participants will be asked to create an account and will then be informed of the details of the study, including its objectives, duration, requirements, and financial payments. If participants are still interested in participating, the Way to Health portal will take them through an automated online informed consent. The consent document will be divided into sections and potential participants will have to click a button to advance through each section. This is to help ensure that participants read the consent form thoroughly by breaking down the form into manageable blocks of text. Each section will have a button allowing the user to contact a researcher via email or by telephone if they have questions about the consent form. Successive screens will explain the voluntary nature of the study, the risks and benefits of participation, alternatives to participation, and that participants can withdraw from the study at any time. On the final consent screen, potential participants who click a clearly delineated button stating that they agree to participate in the study will be considered to have consented to enroll. Participants will be provided with details regarding how to contact the research team via email or phone at any time if they subsequently wish to withdraw from the study. This contact information will remain easily accessible via the participants’ individual Way to Health web portal dashboards throughout the study.

*8.2 Procedures*

After providing informed consent, participants will complete an online questionnaire to determine their eligibility and complete the study surveys. Eligible participants will receive a phone call from the research study coordinator to schedule a time for an in-person baseline weigh-in with their teammate. During that meeting, the participant will be given a wireless weight scale and be shown how to use the Withings app to sync weight data and track physical activity. The participant will be asked to select a weight loss goal in pounds that is between 6% to 8% of their baseline weight. The will be offered pre-selected goals at the 6, 7, and 8% target rounded up to the nearest pound, but will be able to choose any weight goal within the 6 to 8% range.

Participants randomized to the intervention arms will be given the instructions of the intervention.

**9. Analysis plan**

To compare sample characteristics between arms we will use t-tests or Wilcoxon rank-sum tests (F-tests or Kruskal-Wallis test) for continuous variables and Pearson chi square tests or Fisher’s exact tests for categorical variables. In our primary analyses, we will compare change in weight for each intervention arm to the control arm at the end of the 24-week intervention period. In the secondary analysis will compare change in weight at the end of the 12-week follow-up period. We will also compare the mean daily steps and the proportion of days achieving the 10,000 step goal for each intervention arm vs. control. All hypothesis tests will be two-sided using a two-sided alpha of 0.025 as our threshold for statistical significance. We will use Stata and/or SAS to analyze the data. We will use multiple imputation for missing data.

**10. Investigators**

Mitesh Patel, MD, MBA, MS is the Principal Investigator (PI) and is an Assistant Professor of Medicine and Health Care Management at the Perelman School of Medicine and The Wharton School at the University of Pennsylvania. He has past experience leading six clinical trials using the Way to Health Platform to deploy interventions using financial and social incentives to promote weight loss and increased physical activity. He currently spends 80% of his effort on research and 20% on clinical and teaching activities.

**11. Human research protection**

*11.1 Data confidentiality*

Paper-based records will be kept in a secure location and only be accessible to personnel involved in the study. Computer-based files will only be made available to personnel involved in the study through the use of access privileges and passwords. Wherever feasible, identifiers will be removed from study-related information. Precautions are in place to ensure the data are secure by using passwords and encryption, because the research involves web-based surveys.

*11.2 Subject confidentiality*

Research material will be obtained from participant surveys, from the weight scales, and from the accelerometers in the smartphone. All participants will provide informed consent for access to these materials. The data to be collected include demographic data (e.g., age, sex, self-identified race), weight data, and daily activity data collected by the smartphone. Research material that is obtained will be used for research purposes only. The same procedure used for the analysis of automated data sources to ensure protection of patient information will be used for the survey data, in that patient identifiers will be used only for linkage purposes or to contact patients. The study identification number, and not other identifying information, will be used on all data collection instruments. All study staff will be reminded to appreciate the confidential nature of the data collected and contained in these databases. The Penn Medicine Academic Computing Services (PMACS) will be the hub for the hardware and database infrastructure that will support the project and is where the Way to Health web portal is based. The PMACS is a joint effort of the University of Pennsylvania's Abramson Cancer Center, the Cardiovascular Institute, the Department of Pathology, and the Leonard Davis Institute. The PMACS provides a secure computing environment for a large volume of highly sensitive data, including clinical, genetic, socioeconomic, and financial information. Among the IT projects currently managed by PMACS are: (1) the capture and organization of complex, longitudinal clinical data via web and clinical applications portals from cancer patients enrolled in clinical trials; (2) the integration of genetic array databases and clinical data obtained from patients with cardiovascular disease; (3) computational biology and cytometry database management and analyses; (4) economic and health policy research using Medicare claims from over 40 million Medicare beneficiaries. PMACS requires all users of data or applications on PMACS servers to complete a PMACS-hosted cybersecurity awareness course annually, which stresses federal data security policies under data use agreements with the university. The curriculum includes Health Insurance Portability and Accountability Act (HIPAA) training and covers secure data transfer, passwords, computer security habits and knowledge of what constitutes misuse or inappropriate use of the server. We will implement multiple, redundant protective measures to guarantee the privacy and security of the participant data. All investigators and research staff with direct access to the identifiable data will be required to undergo annual responsible conduct of research, cybersecurity, and HIPAA certification in accordance with University of Pennsylvania regulations. All data for this project will be stored on the secure/firewalled servers of the PMACS Data Center, in data files that will be protected by multiple password layers. These data servers are maintained in a guarded facility behind several locked doors, with very limited physical access rights. They are also cyber-protected by extensive firewalls and multiple layers of communication encryption. Electronic access rights are carefully controlled by University of Pennsylvania system managers. We will use highly secure methods of data encryption for all transactions involving participants’ financial information using a level of security comparable to what is used in commercial financial transactions. We believe this multi-layer system of data security, identical to the system protecting the University of Pennsylvania Health Systems medical records, greatly minimizes the risk of loss of privacy. In addition, risk of loss of confidentiality will be minimized by storing completed paper copies of the surveys and signed informed consent forms in locked file cabinets in locked offices accessible only to trained study staff. Each subject will be assigned a unique identifier without identifying information, and data will be entered into an electronic database using only the unique identifier. Only trained study staff will have access to the code that links the unique identifier to the subject’s identity. Electronic data will be stored on secure, password-protected firewalled servers at the University of Pennsylvania.

*11.3 Subject privacy*

Interested participants will be directed to the Way to Health portal where they will be asked to enter data related to eligibility and their demographic characteristics. Enrollment will include a description of the voluntary nature of participation, the study procedures, risks and potential benefits in detail. The enrollment procedure will provide the opportunity for potential participants to ask questions and review the consent form information with family and friends prior to making a decision to participate. Participants will be told that they do not have to answer any questions if they do not wish and can drop out of the study at any time, without affecting their medical care or the cost of their care. They will be told that they may or may not benefit directly from the study and that all information will be kept strictly confidential, except as required by law. Subjects will be given a copy of the consent document. All efforts will be made by study staff to ensure subject privacy.

*11.4 Data disclosure*

The following entities, besides the members of the research team, may receive protected health information (PHI) for this research study: -Wells Fargo, the company which processes study-related payments. Patient addresses and account balances will be stored on their secure computers. –P’unk Ave., LLC, a software development company designing the Way to Health website. P’unk Ave. will not store any of the patients' PHI, but they will have access to de-identified patient information, for the purposes of website administration and development. - Misfit Wearables, the company that designs and manufactures the wearable devices used in the study to track participant physical activity. -Twilio, Inc., the company which processes some study-related messages. Twilio will store patients' phone numbers on their secure computers. -Qualtrics, Inc., the company which processes most study-related surveys. Qualtrics will house de-identified answers to these surveys on their secure servers. -The Office of Human Research Protections at the University of Pennsylvania -Federal and state agencies (for example, the Department of Health and Human Services, the National Institutes of Health, and/or the Office for Human Research Protections), or other domestic or foreign government bodies if required by law and/or necessary for oversight purposes.

*11.5 Data safety and monitoring*

The data monitoring system will track participant weight loss for the duration of the study. The electronic system will be programmed to alert the Study Coordinator by email whenever a participant loses more than 10 pounds in a week. Participants who are flagged for excessive weight loss will be contacted by phone by the research study coordinator. During this phone call the research study coordinator will discuss the importance of moderate weight loss rates (i.e., 1-2 pounds per week) with the participant, remind the participant that there is no additional monetary benefit to losing weight rapidly, and encourage the individual to moderate their weight loss habits. In addition, the coordinator will ask the participant if he or she is engaging in any behaviors such as self-induced vomiting or dehydration, fasting, or excessive exercise. All cases of excessive weight loss will be discussed with the PI, who will consider whether continuation in the study is appropriate based on patterns of excessive weight loss and information provided by the participant. For this study there will be no stopping rules or endpoints and thus no planned interim analyses.

*11.6 Risk/benefit*

*11.6.1 Potential study risks*

To minimize the chance for serious and unexpected adverse events, study participants will be screened through exclusion criteria for any health conditions that may be exacerbated by participating in a weight loss study. The intervention tries to motivate a gradual weight loss that should pose little health risk to participants. Another potential risk of this study is a breach of participant confidentiality. We will minimize this risk by linking individual identifying information with participant ID numbers only in one single secure file that will only be accessed by the study team in the case of an adverse medical event, participant dropout, or if otherwise deemed necessary by the Principal Investigator. All other identifying information will be discarded after initial contact with the Study Coordinator. Due to the financial incentives in this study, we will be collecting social security numbers so that we can complete W-9 forms for participants. Social security numbers only will be used to generate W-9 forms and will be deleted once they are no longer needed. We will also collect home addresses to mail incentive payments. This will be done through a University of Pennsylvania approved partnership with Wells Fargo. Accidental disclosure of social security numbers could lead to identity theft. We will use commercial-grade encryption to protect social security information in transit. Names and addresses will be stored in encrypted databases. These data will be viewable only by the respective participants and the study coordinator. All other members of the research team will be able to view only participant ID numbers. There will be no functionality in the web application to export a dataset with identifiable information. Even the study arms will be identified by code letters until both the statistician and PI agree that analysis is complete.

*11.6.2 Potential study benefits*

Through participation in this study, each participant will have the potential to lose weight, which could improve their health and reduce their risk for future cardiovascular disease or other conditions such as diabetes, hypertension, and osteoarthritis. If this approach is effective, it could have tremendous benefits for society if adopted on a wide scale to help individuals lose weight. It is expected that other people will gain knowledge from this study and that participation could help understand how to effectively motivate people to lose weight. Participants may also receive no benefit from their participation in the study.

*11.6.3 Risk/benefit assessment*

Anticipated risks of this study should be minimal and the risk/benefit ratio is very favorable. To minimize the chance for serious and unexpected adverse events, study participants will be screened through exclusion criteria for any health conditions that may be exacerbated by participating in a weight loss study. Participants that lost weight may improve their health and reduce their risk for future cardiovascular disease or other conditions such as diabetes, hypertension, and osteoarthritis.
